# Supplementary material for: Detection of Human Papillomavirus DNA in Paired Peripheral Blood and Cervix Samples in Patients with Cervical Lesions and Healthy Individuals
Source: MDPI journal article supplement (doi:10.3390/jcm10215209), 2021-11-08
Supplement: s1 [file s1]

Supplementary Table S1. Title.

| Patient | Age | Residence | Ethnicity | Age at the first sexual relation | Number of pregnancies | Number of sexual partners | Contraceptive use | Smoking | Previous STIs | HPV DNA in the blood | HPV DNA in the cervix | Healthy_CINI_CINII_CINIII |
|---------|-----|-----------|-----------|----------------------------------|-----------------------|---------------------------|-------------------|---------|---------------|----------------------|-----------------------|---------------------------|
| 5       | 1   | 0         | 2         | 0                                | 1                     | 0                         | 0                 | 0       | 0             | 0                    | 0                     | 1                         |
| 11      | 0   | 1         | 2         | 0                                | 1                     | 0                         | 1                 | 0       | 1             | 1                    | 0                     | 1                         |
| 16      | 2   | 1         | 2         | 0                                | 1                     | 0                         | 0                 | 0       | 1             | 1                    | 1                     | 1                         |
| 17      | 0   | 1         | 2         | 0                                | 1                     | 1                         | 1                 | 0       | 1             | 0                    | 0                     | 1                         |
| 18      | 1   | 0         | 2         | 0                                |                       | 1                         | 0                 | 1       | 1             | 0                    | 0                     | 1                         |
| 22      | 1   | 1         | 2         | 0                                | 1                     | 0                         | 0                 | 0       | 0             | 1                    | 1                     | 1                         |
| 23      | 1   | 1         | 0         | 0                                | 1                     | 0                         | 0                 | 0       | 0             | 0                    | 1                     | 1                         |
| 29      | 0   | 1         | 0         | 0                                | 1                     | 0                         | 0                 | 0       | 1             | 0                    | 0                     | 1                         |
| 39      | 0   | 1         | 1         | 0                                |                       | 2                         | 0                 | 0       | 1             | 0                    | 1                     | 1                         |
| 43      | 0   | 0         | 0         | 0                                | 2                     | 1                         | 0                 | 0       | 1             | 0                    | 0                     | 1                         |
| 44      | 0   | 1         | 2         | 0                                | 2                     | 1                         | 0                 | 0       | 0             | 1                    | 0                     | 1                         |
| 46      | 1   | 1         | 2         | 0                                | 2                     | 0                         | 0                 | 2       | 0             | 1                    | 1                     | 1                         |
| 52      | 0   | 1         | 1         | 0                                |                       | 2                         | 0                 | 1       | 0             | 1                    | 1                     | 1                         |
| 66      | 0   | 1         | 1         | 0                                | 0                     | 1                         | 1                 | 1       |               | 1                    | 0                     | 1                         |
| 69      | 0   | 0         | 0         | 0                                | 0                     | 0                         | 1                 | 2       | 1             | 1                    | 1                     | 1                         |
| 72      | 0   |           | 1         | 0                                | 1                     | 0                         | 0                 | 0       |               | 0                    | 0                     | 1                         |
| 73      | 0   | 1         | 1         | 0                                |                       | 0                         | 0                 | 0       |               | 1                    | 1                     | 1                         |
| 105     | 0   | 1         | 1         | 0                                |                       | 1                         | 0                 | 1       | 0             | 0                    | 0                     | 1                         |
| 106     | 1   | 1         | 1         | 0                                | 2                     | 1                         | 0                 | 1       | 0             | 0                    | 1                     | 1                         |
| 109     | 1   | 1         | 2         | 1                                | 1                     | 1                         | 0                 | 0       | 0             | 1                    | 0                     | 1                         |
| 110     | 0   | 1         | 1         | 0                                | 2                     | 2                         | 0                 | 0       | 1             | 1                    | 1                     | 1                         |
| 111     | 0   | 1         | 1         | 0                                | 2                     | 2                         | 0                 | 2       | 0             | 0                    | 1                     | 1                         |
| 116     | 0   | 1         | 0         | 0                                |                       | 2                         | 0                 | 0       | 0             | 0                    | 1                     | 1                         |
| 121     | 0   | 1         | 0         | 1                                | 1                     | 1                         | 0                 | 1       | 0             | 0                    | 0                     | 1                         |
| 125     | 1   | 1         | 0         | 0                                | 2                     | 0                         | 0                 | 1       | 0             | 1                    | 1                     | 1                         |
| 128     | 1   | 1         | 2         | 0                                | 2                     | 1                         | 0                 | 0       | 0             | 0                    | 0                     | 1                         |
| 133     | 0   | 1         | 2         | 0                                | 2                     | 0                         | 0                 | 0       | 0             | 1                    | 1                     | 1                         |
| 135     | 0   | 1         | 2         | 0                                | 0                     | 2                         | 0                 | 0       | 0             | 0                    | 0                     | 1                         |
| 136     | 0   | 1         | 2         | 0                                | 0                     | 1                         | 0                 | 0       | 0             | 0                    | 0                     | 1                         |
| 137     | 0   | 1         | 1         | 0                                | 1                     | 0                         | 0                 | 0       | 0             | 1                    | 1                     | 1                         |

|     |   |   |   |   |   |   |   |   |   |   |   |   |
|-----|---|---|---|---|---|---|---|---|---|---|---|---|
| 139 | 1 | 0 | 1 | 0 | 1 | 1 | 0 | 0 | 1 | 0 | 0 | 1 |
| 145 | 0 | 0 | 1 | 0 | 1 | 0 | 0 | 0 | 1 | 1 | 1 | 1 |
| 146 | 1 | 1 | 2 | 1 | 1 | 0 | 0 | 0 | 0 | 0 | 0 | 1 |
| 149 | 0 | 1 | 1 | 0 | 0 |   | 1 | 0 | 0 | 0 | 0 | 1 |
| 151 | 1 | 0 | 2 | 0 | 0 | 1 | 0 | 2 | 0 | 0 | 0 | 1 |
| 27  | 0 | 1 | 2 | 0 | 1 | 0 | 0 | 1 | 1 | 1 | 1 | 1 |
| 30  | 1 | 1 | 1 | 0 | 2 | 1 | 0 | 0 | 1 | 1 | 1 | 1 |
| 45  | 0 | 1 | 1 | 1 |   | 0 | 1 | 0 | 1 | 0 | 1 | 1 |
| 47  | 0 | 1 | 1 | 0 |   | 0 | 1 | 0 | 0 | 1 | 1 | 1 |
| 50  | 0 | 0 | 2 | 0 | 0 | 0 | 0 | 2 | 1 | 1 | 0 | 1 |
| 54  | 0 | 1 | 0 | 0 |   | 1 | 1 | 0 | 0 | 0 | 0 | 1 |
| 71  | 0 |   | 2 | 0 | 0 | 0 | 0 | 0 | 1 | 0 | 1 | 1 |
| 80  | 0 | 1 | 0 | 0 | 1 | 1 | 1 | 2 |   | 0 | 0 | 1 |
| 13  | 0 | 1 | 2 | 0 | 1 | 0 | 1 | 0 | 0 | 1 | 1 | 2 |
| 28  | 0 | 1 | 2 | 1 | 1 | 0 | 1 | 0 | 0 | 1 | 1 | 2 |
| 32  | 1 | 1 | 2 | 3 |   | 0 | 0 | 0 | 0 | 0 | 0 | 2 |
| 33  | 0 | 0 | 1 | 0 | 0 | 1 | 0 | 0 | 0 | 1 | 1 | 2 |
| 56  | 0 | 1 | 2 | 0 |   | 1 | 0 | 0 | 1 | 1 | 0 | 2 |
| 65  | 0 | 1 | 2 | 0 |   | 1 | 1 | 0 | 1 | 0 | 1 | 2 |
| 67  | 1 | 0 | 2 | 0 | 2 | 0 | 0 | 0 |   | 1 | 1 | 2 |
| 76  | 0 | 1 | 0 | 1 | 1 | 0 | 0 | 0 | 1 | 1 | 1 | 2 |
| 77  | 0 | 1 | 1 | 0 | 0 | 0 | 0 | 0 |   | 0 | 1 | 2 |
| 83  | 0 |   | 1 | 0 | 1 | 0 | 0 | 0 |   | 0 | 0 | 2 |
| 100 | 0 | 1 | 2 | 0 | 0 | 1 | 0 | 0 | 0 | 0 | 0 | 2 |
| 102 | 0 | 1 | 1 | 0 | 1 |   | 0 | 1 | 0 | 0 | 1 | 2 |
| 130 | 0 | 1 | 0 | 0 |   | 1 | 0 | 0 | 0 | 1 | 0 | 2 |
| 147 | 1 | 1 | 0 | 0 | 1 | 0 | 0 | 0 | 0 | 0 | 0 | 2 |
| 9   | 0 | 1 | 1 | 0 | 2 | 1 | 0 | 1 | 0 | 1 | 1 | 2 |
| 148 | 0 | 1 | 2 | 0 |   | 1 | 0 | 0 | 0 | 1 | 0 | 2 |
| 6   | 0 | 1 | 1 | 0 | 0 | 0 | 1 | 0 | 0 | 1 | 1 | 3 |
| 10  | 1 | 1 | 1 | 0 | 2 | 1 | 0 | 0 | 1 | 1 | 0 | 3 |
| 36  | 1 | 1 | 2 | 0 | 1 | 2 | 0 | 0 | 0 | 1 | 1 | 3 |
| 61  | 1 | 1 | 1 | 0 | 2 |   | 0 | 0 |   | 1 | 1 | 3 |
| 70  | 1 | 1 | 2 | 1 |   | 1 | 0 | 0 |   | 1 | 1 | 3 |
| 88  | 0 |   | 1 | 2 |   |   | 0 | 0 |   | 0 | 1 | 3 |
| 90  | 1 | 1 | 2 | 0 | 1 | 1 | 0 | 0 | 0 | 1 | 0 | 3 |

|     |   |   |   |   |   |   |   |   |   |   |   |   |
|-----|---|---|---|---|---|---|---|---|---|---|---|---|
| 92  | 1 | 1 | 0 | 0 | 2 | 0 | 0 | 0 | 0 | 1 | 0 | 3 |
| 93  | 0 | 1 | 1 | 0 | 1 | 2 | 1 | 0 | 0 | 0 | 0 | 3 |
| 3   | 0 | 0 | 1 | 0 |   | 0 | 0 | 0 | 0 | 0 | 0 | 0 |
| 4   | 0 | 1 | 2 | 0 | 1 | 0 | 0 | 0 | 0 | 0 | 0 | 0 |
| 8   | 1 | 1 | 1 | 1 | 2 | 0 | 0 | 0 | 0 | 1 | 0 | 0 |
| 12  | 0 | 1 | 1 | 0 |   | 1 | 1 | 0 | 0 | 1 | 0 | 0 |
| 14  | 0 | 1 | 0 | 1 |   | 1 | 0 | 0 | 0 | 1 | 1 | 0 |
| 21  | 0 | 1 | 2 | 0 | 1 | 0 | 0 | 0 | 0 | 0 | 0 | 0 |
| 24  | 0 | 1 | 1 | 2 | 1 | 0 | 0 | 0 | 0 | 1 | 0 | 0 |
| 25  | 0 | 1 | 2 | 0 | 0 | 1 | 1 | 0 | 0 | 0 | 0 | 0 |
| 31  | 1 | 1 | 2 | 1 | 1 | 0 | 0 | 0 | 0 | 0 | 0 | 0 |
| 35  | 0 | 1 | 1 | 0 | 1 | 0 | 0 | 0 | 0 | 1 | 1 | 0 |
| 51  | 1 | 1 | 1 | 0 | 2 | 0 | 0 | 0 | 0 | 1 | 0 | 0 |
| 53  | 0 | 1 | 0 | 1 | 1 | 0 | 0 | 0 | 0 | 1 | 0 | 0 |
| 58  | 1 | 1 | 1 | 0 |   | 1 | 0 | 0 | 0 | 1 | 1 | 0 |
| 59  | 0 | 1 | 1 | 0 |   | 0 | 1 | 0 | 0 | 0 | 0 | 0 |
| 60  | 1 | 1 | 2 | 1 | 0 | 1 | 0 | 0 | 0 | 0 | 0 | 0 |
| 63  | 2 | 1 | 1 | 0 | 2 | 0 | 0 | 0 |   | 1 | 0 | 0 |
| 64  | 0 | 0 | 1 | 0 | 1 | 0 | 0 | 0 |   | 1 | 1 | 0 |
| 75  | 0 | 1 | 1 | 0 |   | 1 | 0 | 0 |   | 1 | 1 | 0 |
| 81  | 0 | 1 | 1 | 0 | 1 | 0 | 0 | 0 |   | 0 | 0 | 0 |
| 82  | 0 | 1 | 2 | 1 |   | 0 | 1 | 0 |   | 0 | 0 | 0 |
| 85  | 0 | 1 | 1 | 0 | 1 | 2 | 1 | 1 |   | 0 | 0 | 0 |
| 86  | 0 | 1 | 1 | 0 | 1 | 1 | 0 | 0 |   | 1 | 0 | 0 |
| 91  | 0 | 1 | 1 | 0 |   | 2 | 0 | 0 | 0 | 1 | 0 | 0 |
| 95  | 1 | 1 | 2 | 0 | 1 |   | 0 | 0 | 0 | 1 | 0 | 0 |
| 96  | 1 | 1 | 2 | 0 |   |   | 0 | 0 | 0 | 0 | 0 | 0 |
| 98  | 1 | 1 | 0 | 2 | 1 | 0 | 0 | 0 | 0 | 0 | 0 | 0 |
| 99  | 1 | 1 | 0 | 0 |   | 0 | 0 | 0 | 0 | 0 | 0 | 0 |
| 104 | 0 | 1 | 1 | 0 | 0 | 1 | 0 | 1 | 0 | 1 | 0 | 0 |
| 107 | 0 | 1 | 1 | 0 | 0 | 0 | 0 | 0 | 0 | 0 | 0 | 0 |
| 108 | 2 | 1 | 0 | 0 | 2 | 0 | 0 | 0 | 0 | 0 | 0 | 0 |
| 112 | 0 | 1 | 1 | 0 | 1 | 2 | 0 | 0 | 0 | 0 | 0 | 0 |
| 113 | 0 | 1 | 1 | 0 | 1 | 0 | 1 | 0 | 0 | 0 | 0 | 0 |
| 114 | 1 | 1 | 2 | 1 | 1 | 0 | 0 | 0 | 0 | 0 | 0 | 0 |
| 115 | 1 | 1 | 2 | 0 | 1 | 0 | 0 | 2 | 1 | 1 | 1 | 0 |

|     |   |   |   |   |   |   |   |   |   |   |   |   |
|-----|---|---|---|---|---|---|---|---|---|---|---|---|
| 118 | 1 | 1 | 2 | 0 | 1 | 1 | 0 | 2 | 0 | 0 | 0 | 0 |
| 119 | 0 | 1 | 1 | 0 | 0 | 2 | 0 | 0 | 0 | 0 | 0 | 0 |
| 120 | 0 | 1 | 0 | 0 | 0 | 0 | 0 | 0 | 0 | 1 | 0 | 0 |
| 122 | 0 | 1 | 2 | 0 |   | 1 | 1 | 0 | 0 | 1 | 1 | 0 |
| 123 | 0 | 1 | 2 | 0 | 1 | 1 | 0 | 1 | 0 | 0 | 0 | 0 |
| 126 | 1 | 1 | 0 | 0 | 1 | 0 | 0 | 0 | 0 | 1 | 1 | 0 |
| 127 | 0 | 1 | 1 | 0 | 1 | 1 | 0 | 1 | 0 | 0 | 0 | 0 |
| 129 | 1 | 1 | 1 | 0 | 1 | 1 | 0 | 2 | 0 | 0 | 0 | 0 |
| 131 | 1 | 1 | 2 | 0 |   | 1 | 0 | 0 | 0 | 1 | 1 | 0 |
| 132 | 1 | 1 | 1 | 0 |   | 1 | 0 | 0 | 0 | 1 | 1 | 0 |
| 134 | 1 | 1 | 0 | 1 | 1 | 1 | 0 | 1 | 0 | 0 | 0 | 0 |
| 141 | 1 | 1 | 1 | 1 | 2 | 0 | 0 | 0 | 0 | 0 | 0 | 0 |
| 142 | 1 | 1 | 1 | 1 |   | 0 | 0 | 0 | 0 | 0 | 0 | 0 |
| 143 | 0 | 1 | 2 | 1 | 0 | 2 | 0 | 0 | 0 | 0 | 0 | 0 |
| 150 | 1 | 0 | 1 | 1 | 1 | 0 | 0 | 2 | 0 | 0 | 0 | 0 |
| 152 | 1 | 1 | 0 | 0 | 0 | 1 | 0 | 0 | 0 | 1 | 1 | 0 |
| 153 | 1 | 1 | 2 | 0 | 1 | 0 | 0 | 0 | 0 | 1 | 1 | 0 |
| 156 | 1 | 1 | 2 | 1 |   | 0 | 0 | 0 | 0 | 1 | 1 | 0 |
| 157 | 1 | 1 | 2 | 0 | 1 | 2 | 0 | 2 | 0 | 1 | 0 | 0 |
| 158 | 0 | 1 | 1 | 0 | 0 | 1 | 1 | 0 | 0 | 1 | 0 | 0 |
| 159 | 0 | 0 | 2 | 1 | 1 | 1 | 0 | 0 | 0 | 0 | 0 | 0 |
| 160 | 1 | 0 | 2 | 0 | 2 | 0 | 0 | 0 | 0 | 0 | 0 | 0 |
| 161 | 0 | 1 | 0 | 0 |   | 1 | 0 | 0 | 0 | 0 | 0 | 0 |
| 162 | 0 | 0 | 2 | 0 | 0 | 0 | 0 | 0 | 0 | 0 | 0 | 0 |
| 163 | 0 | 1 | 1 | 1 | 1 | 0 | 1 | 0 | 0 | 0 | 0 | 0 |
| 168 | 0 | 0 | 2 | 0 | 1 |   | 0 | 0 | 0 | 1 | 0 | 0 |
| 169 | 0 | 1 | 2 | 0 | 1 |   | 0 | 0 | 0 | 0 | 0 | 0 |
| 170 | 0 | 1 | 1 | 0 | 0 |   | 1 | 0 | 0 | 1 | 0 | 0 |
| 171 | 0 | 1 | 1 | 0 |   | 2 | 1 | 0 | 0 | 0 | 0 | 0 |
| 20  | 1 | 0 | 2 | 0 | 1 | 0 | 0 | 0 | 0 | 0 | 0 | 0 |
| 49  | 0 | 1 | 2 | 1 | 0 | 0 | 1 | 0 | 0 | 1 | 1 | 0 |
| 62  | 1 | 1 | 2 | 0 |   | 0 | 0 | 0 |   | 1 | 1 | 0 |
| 68  | 0 | 1 | 2 | 0 | 1 | 0 | 0 | 0 |   | 1 | 0 | 0 |
| 74  | 0 | 1 | 1 | 0 | 0 | 1 | 0 | 0 |   | 1 | 1 | 0 |
| 87  | 1 | 1 | 1 | 0 | 1 | 0 | 0 | 1 |   | 0 | 0 | 0 |
| 94  | 1 | 1 | 2 | 0 | 2 | 1 | 0 | 0 | 0 | 1 | 1 | 0 |

|         |          |           |           |                                 |                       |                           |                   |         |               |                      |                       |                              |
|---------|----------|-----------|-----------|---------------------------------|-----------------------|---------------------------|-------------------|---------|---------------|----------------------|-----------------------|------------------------------|
| 97      | 1        | 1         | 1         | 1                               | 1                     | 2                         | 0                 | 0       | 0             | 0                    | 0                     | 0                            |
| LEGEND  |          |           |           |                                 |                       |                           |                   |         |               |                      |                       |                              |
| Patient | Age      | Residence | Ethnicity | Age at he first sexual relation | Number of pregnancies | Number of sexual partners | Contraceptive use | Smoking | Previous STIs | HPV DNA in the blood | HPV DNA in the cervix | Healthy_CIN I_CIN II_CIN III |
| Number  | 0 - <45  | 0 - Rural | 0 - Black | 0-<20                           | 0-1                   | 0-1                       | 0-No              | 0-No    | 0-No          | 0-No                 | 0-No                  | 0-Without lesions            |
|         | 1- 40-60 | 1 - Urban | 1 - Other | 1-20-30                         | 1 - 2 or 3            | 1 - 2 or 3                | 1 -Yes            | 1-Yes   | 1-Yes         | 1-Yes                | 1-Yes                 | 1-CIN I                      |
|         | 2- >60   |           | 2 - White | 2-30-40                         | 2->4                  | 2->4                      |                   |         |               |                      |                       | 2-CIN II                     |
|         |          |           |           | 3->40                           |                       |                           |                   |         |               |                      |                       | 3-CIN III                    |

Supplementary Table S2. Title.

| Patient | Viral load in the cervix | Viral load in the blood | Physical status in the blood | Physical status in the cervix | Healthy_CINI_CIN II_CIN III |
|---------|--------------------------|-------------------------|------------------------------|-------------------------------|-----------------------------|
| 58      | 14                       | 34.89                   | Mixed                        | Mixed                         | Healthy                     |
| 62      | 8.3                      | 8.52                    | Episomal                     | Mixed                         | Healthy                     |
| 63      | 0.12                     | 8                       | Integrated                   | Mixed                         | Healthy                     |
| 64      | 78                       | 46.47                   | Integrated                   | Integrated                    | Healthy                     |
| 74      | 99.7                     | 2.76                    | Episomal                     | Mixed                         | Healthy                     |
| 75      | 35.3                     | 17.24                   | Mixed                        | Integrated                    | Healthy                     |
| 115     | 0.12                     | 33                      | Integrated                   | Mixed                         | Healthy                     |
| 122     | 3.6                      | 479.6                   | Integrated                   | Integrated                    | Healthy                     |
| 125     | 0.14                     | 10.37                   | Episomal                     | Mixed                         | Healthy                     |
| 131     | 16.1                     | 5.75                    | Mixed                        | Integrated                    | Healthy                     |
| 132     | 6.1                      | 60.35                   | Mixed                        | Integrated                    | Healthy                     |
| 152     | 15.5                     | 16.03                   | Mixed                        | Episomal                      | Healthy                     |
| 153     | 163.1                    | 10.6                    | Episomal                     | Episomal                      | Healthy                     |
| 156     | 10.6                     | 10.21                   | Mixed                        | Episomal                      | Healthy                     |
| 158     | 4                        | 83.89                   | Mixed                        | Episomal                      | Healthy                     |
| 170     | 246.5                    | 9.92                    | Episomal                     | Mixed                         | Healthy                     |
| 172     | 0.68                     | 3.47                    | Episomal                     | Episomal                      | Healthy                     |
| 6       | 138.00                   | 17.12                   | Mixed                        | Mixed                         | CIN III                     |
| 9       | 68.10                    | 4.38                    | Mixed                        | Integrated                    | CIN III                     |
| 16      | 0.19                     | 4                       | Episomal                     | Mixed                         | CIN III                     |
| 30      | 24.30                    | 3.65                    | Episomal                     | Integrated                    | CIN II                      |
| 47      | 18.90                    | 3.91                    | Mixed                        | Mixed                         | CIN I                       |
| 52      | 15.10                    | 21.58                   | Episomal                     | Mixed                         | CIN I                       |
| 61      | 42.20                    | 4.21                    | Mixed                        | Episomal                      | CIN III                     |
| 67      | 3.90                     | 4.09                    | Mixed                        | Integrated                    | CIN II                      |
| 69      | 1.00                     | 5.05                    | Mixed                        | Episomal                      | CIN I                       |
| 92      | 7.13                     | 11.69                   | Episomal                     | Mixed                         | CIN III                     |
| 136     | 0.15                     | 9.87                    | Mixed                        | Episomal                      | CIN I                       |
| 137     | 0.20                     | 7.31                    | Mixed                        | Integrated                    | CIN I                       |
